# Supplementary material
Source: HighWire-hosted journal article supplement (https://bmjopen.bmj.com/content/8/11/e020433)
Supplement: inline-supplementary-material-1 [file inline-supplementary-material-1.pdf]

**Supplementary File 1:** Summary of control group education, implementation and program evaluation data

***Control group education***

Teachers from five control schools provided information about the content and quality of drug education they implemented with their Year 10 students in 2014. All schools delivered some form of education about ecstasy and/or NPS over the course of the year. Topics included short- and long-term effects, refusal skills and how to stay safe. The number of lessons spent on ecstasy and NPS education ranged from one to 2.5 lessons, with a mean lesson time of 58 minutes. Three schools reported using computers and the Internet to deliver the information and three schools indicated that guest speakers (police, drug and alcohol professionals) spoke to students. Control schools were offered complimentary use of the *Climate Schools: Ecstasy & Emerging Drugs module* at the end of the study.

***Self-reported implementation data***

Teachers from three of the five intervention schools provided fidelity data. All teachers indicated that their students completed the online cartoon component for each of the four lessons of the program. Teachers were able to choose which activities to implement to ensure the activity suited the needs of their class. As such, teachers varied in terms of which and how many activities they completed with their class, however, all teachers reported delivering at least one activity per lesson.

***Program evaluation***

A random sample of students (n=94) from the intervention schools provided feedback about the *Climate Schools* program. Most students agreed that the online cartoons were an

enjoyable way of learning PDHPE theory (86%) and that they would like to learn other topics in this manner (77%). In terms of the online activities, 78% thought that they were fun and interactive and 81% indicated that the activities helped them to better understand the information. Teachers from three intervention schools provided evaluation data about the *Climate Schools: Ecstasy & Emerging Drugs module*. All teachers rated the program as either 'good' or 'very good' and indicated that they would be likely to use the program again in the future and to recommend it to others.
