# Supplementary material
Source: HighWire-hosted journal article supplement (https://bmjopen.bmj.com/content/8/11/e020433)
Supplement: inline-supplementary-material-2 [file inline-supplementary-material-2.pdf]

**Supplementary File 2:** Baseline covariates included in the propensity score model

| <b>Covariate</b>                                                                           | <b>Coding</b>                                                   |
|--------------------------------------------------------------------------------------------|-----------------------------------------------------------------|
| Gender                                                                                     | 0=Male<br>1=Female                                              |
| Age                                                                                        | Continuous variable in years                                    |
| Academic grades<br><i>(self-reported usual grades)</i>                                     | 0=59% or below<br>1=60-69%<br>2=70-79%<br>3=80-89%<br>4=90-100% |
| Truancy<br><i>(number of days off school without parental permission in the past year)</i> | 0=0 days<br>1=1.5days<br>2=4 days<br>3=8 days<br>5=10 days      |
| Ever been offered ecstasy                                                                  | 0=Never been offered<br>1=Been offered                          |
| Ever used ecstasy                                                                          | 0=Never used<br>1=Used once or more                             |
| Ever used NPS                                                                              | 0=Never used<br>1=Used once or more                             |
| Ever used synthetic cannabis                                                               | 0=Never used<br>1=Used once or more                             |
| Peer use of ecstasy<br><i>(proportion of peers who use ecstasy)</i>                        | 0=None<br>1=Less than half<br>2=More than half                  |
| Ever used tobacco                                                                          | 0=Never used<br>1= Used once or more                            |

| Covariate                                                                                                 | Coding                                                                                                                                |
|-----------------------------------------------------------------------------------------------------------|---------------------------------------------------------------------------------------------------------------------------------------|
| Frequency of binge drinking<br>(5 or more standard alcoholic drinks on one occasion in the past 6 months) | 0=Never<br>1=Less than monthly<br>2=Once a month<br>3=2-3 times per month<br>4=Weekly (e.g. every weekend)<br>5=Daily or almost daily |
| Ever used cannabis                                                                                        | 0=Never<br>1=Tried once<br>2=Tried more than once and less than 5 times<br>3=Tried more than 5 times                                  |
| Conduct problems                                                                                          | Continuous total score, derived from the Strengths and Difficulties Questionnaire (SDQ) <sup>1</sup> conduct subscale                 |
| Self-efficacy to resist peer pressure                                                                     | Continuous total score, derived from an 8-item version of the Resistive Self-Regulatory Efficacy Scale <sup>2</sup>                   |
| Intentions to use ecstasy in the next 6 months                                                            | 0=Very unlikely/unlikely/unsure<br>1=Likely/very likely                                                                               |
| Beliefs about ecstasy and NPS<br>(“Using ecstasy and NPS makes other people not want to be around you”)   | 0=Strongly agree<br>1=Agree<br>2=Disagree<br>3=Strongly Disagree                                                                      |
| Beliefs about ecstasy and NPS<br>(“Using ecstasy and NPS gets you into trouble”)                          | 0=Strongly agree<br>1=Agree<br>2=Disagree<br>3=Strongly Disagree                                                                      |
| Knowledge about ecstasy                                                                                   | Continuous total score, derived from a 15-item ecstasy knowledge scale                                                                |
| Peer deviance<br>(relations with deviant peers)                                                           | Continuous total score, derived from an adapted 5-item peer deviance scale <sup>3</sup>                                               |
| Emotional and behavioural difficulties                                                                    | Continuous total score, derived from the SDQ                                                                                          |
| Knowledge about NPS                                                                                       | Continuous total score, derived from a 5-item NPS knowledge scale                                                                     |
| Intentions to use synthetic cannabis in the next 6 months                                                 | 0=Very unlikely/unlikely/unsure<br>1=Likely/very likely                                                                               |
| Intentions to use synthetic stimulants in the next 6 months                                               | 0=Very unlikely/unlikely/unsure<br>1=Likely/very likely                                                                               |

| Covariate                                      | Coding                                                                                                                                |
|------------------------------------------------|---------------------------------------------------------------------------------------------------------------------------------------|
| Intentions to use any NPS in the next 6 months | 0=Very unlikely/unlikely/unsure<br>1=Likely/very likely                                                                               |
| Psychological distress                         | Continuous total score, derived from the Kessler 6 scale <sup>4</sup>                                                                 |
| Parenting monitoring                           | Continuous total score, derived from a 2-item parental monitoring scale                                                               |
| Frequency of alcohol use                       | 0=Never<br>1=Less than monthly<br>2=Once a month<br>3=2-3 times per month<br>4=Weekly (e.g. every weekend)<br>5=Daily or almost daily |

1. Goodman R. Psychometric Properties of the Strengths and Difficulties Questionnaire. *J Am Acad Child Adolesc Psychiatry* 2001;40(11):1337-45. doi: <http://dx.doi.org/10.1097/00004583-200111000-00015>
2. Bandura A, Caprara GV, Barbaranelli C, et al. Role of affective self-regulatory efficacy in diverse spheres of psychosocial functioning. *Child Dev* 2003;74(3):769-82. doi: 10.1111/1467-8624.00567
3. Svensson R. Gender differences in adolescent drug use the impact of parental monitoring and peer deviance. *Youth & Society* 2003;34(3):300-29.
4. Kessler RC, Andrews G, Colpe LJ, et al. Short screening scales to monitor population prevalences and trends in non-specific psychological distress. *Psychol Med* 2002;32(6):959-76. [published Online First: 2002/09/07]
