# Supplementary material
Source: HighWire-hosted journal article supplement (https://bmjopen.bmj.com/content/8/11/e020433)
Supplement: inline-supplementary-material-3 [file inline-supplementary-material-3.pdf]

**Supplementary File 3:** Unweighted descriptive statistics for outcome variables by dosage group

| Outcome                                | Group      | Baseline                  | 24-month    |
|----------------------------------------|------------|---------------------------|-------------|
| Ecstasy intentions, % (n)              | FULL       | 1.06 (4)                  | 3.88 (9)    |
|                                        | INCOMPLETE | 3.88 (10) <sup>b</sup>    | 8.18 (13)   |
|                                        | CONTROL    | 0.82 (4)                  | 3.48 (10)   |
| NPS intentions, % (n)                  | FULL       | 1.32 (5)                  | 1.73 (4)    |
|                                        | INCOMPLETE | 2.33 (6)                  | 5.66 (9)    |
|                                        | CONTROL    | 0.82 (4)                  | 2.79 (8)    |
| Synthetic cannabis intentions, % (n)   | FULL       | 5.82 (22)                 | 6.03 (14)   |
|                                        | INCOMPLETE | 8.53 (22) <sup>b</sup>    | 9.43 (15)   |
|                                        | CONTROL    | 4.5 (22)                  | 8.7 (25)    |
| Synthetic stimulants intentions, % (n) | FULL       | 1.9 (7)                   | 1.72 (4)    |
|                                        | INCOMPLETE | 2.7 (7) <sup>b</sup>      | 5.03 (8)    |
|                                        | CONTROL    | 0.8 (4)                   | 1.05 (3)    |
| Ever used ecstasy, % (n)               | FULL       | 1.59 (6)                  | 3.88 (9)    |
|                                        | INCOMPLETE | 4.25 (11) <sup>b</sup>    | 12.35 (20)  |
|                                        | CONTROL    | 1.23 (6)                  | 2.7 (8)     |
| Ever used NPS, % (n)                   | FULL       | 1.06 (4)                  | 2.16 (5)    |
|                                        | INCOMPLETE | 6.18 (16) <sup>b</sup>    | 8.07 (13)   |
|                                        | CONTROL    | 2.86 (14)                 | 2.44 (7)    |
| Ever used synthetic cannabis, % (n)    | FULL       | 0.79 (3)                  | 1.72 (4)    |
|                                        | INCOMPLETE | 4.63 (12)                 | 8.02 (13)   |
|                                        | CONTROL    | 2.45 (12)                 | 1.38 (4)    |
| Ever used synthetic stimulants, % (n)  | FULL       | 0.00 (0)                  | 1.69 (4)    |
|                                        | INCOMPLETE | 2.06 (5) <sup>b</sup>     | 4.88 (8)    |
|                                        | CONTROL    | 0.0 (0)                   | 1.02 (3)    |
| Ecstasy knowledge (M, SD)              | FULL       | 10.51 (0.13) <sup>a</sup> | 11.63 (.22) |
|                                        | INCOMPLETE | 10.67 (0.16) <sup>b</sup> | 10.59 (.28) |
|                                        | CONTROL    | 9.18 (2.87)               | 9.99 (.21)  |
| NPS knowledge (M, SD)                  | FULL       | 3.33 (.07) <sup>a</sup>   | 3.92 (.09)  |
|                                        | INCOMPLETE | 3.32 (.08) <sup>b</sup>   | 3.40 (.12)  |
|                                        | CONTROL    | 2.71 (.06)                | 3.07 (.09)  |

<sup>a</sup> Significant baseline difference full dose vs. control

<sup>b</sup> Significant baseline difference incomplete dose vs. control
